# Supplementary material
Source: PubMed Central journal article supplement (PMC3668788)
Supplement: NIHMS459954-supplement-Title_page.pdf [file NIHMS459954-supplement-Title_page.pdf]

**How Quality Improvement Interventions for Depression Affect Stigma Concerns Over Time: A Nine-Year Follow-Up Study**

Ruth Klap, Ph.D.

Lingqi Tang, Ph.D.

Terry Schell, Ph.D.

Naihua Duan, Ph.D.

Kenneth Wells, M.D., M.P.H.

Jeanne Miranda, Ph.D.

Cathy Sherbourne, Ph.D.

Dr. Klap, Dr. Tang, Dr. Wells, and Dr. Miranda are with the Department of Psychiatry and Biobehavioral Sciences, University of California, Los Angeles, 10920 Wilshire Blvd., Suite 300, Los Angeles, CA 90024 (e-mail: [ruth@soc.ucla.edu](mailto:ruth@soc.ucla.edu)). Dr. Schell and Dr. Sherbourne are with the Department of Health, RAND, Santa Monica, California. Dr. Duan is with the Department of Biostatistics, Columbia University, New York.
